# Supplementary material for: Effects of elevated production of autochthonous dissolved organic matter on the freely dissolved concentration of cadmium
Source: Royal Society of Chemistry journal article supplement (doi:10.1039/c8em00012c), 2018-01-01
Supplement: c8em00012c1.pdf [file c8em00012c1.pdf]

Electronic supplementary information

## Effects of Elevated Production of Autochthonous Dissolved Organic Matter on the freely dissolved concentration of Cadmium

Qianqian Dong<sup>a,b</sup>, Feng Wang<sup>a</sup>, Yihua Xiao<sup>c</sup>, Penghui Li<sup>a,d</sup>, Qinghui Huang<sup>a\*</sup>

*a. Key Laboratory of Yangtze River Water Environment of the Ministry of Education, College of Environmental Science and Engineering,*

*Tongji University, Shanghai 200092, China. \*Corresponding author, E-mail: qhhuang@tongji.edu.cn*

*b. Department of Mechanical Engineering, University of Wisconsin Milwaukee, Milwaukee, 53201, USA*

*c. Department of Biological and Environmental Science, University of Jyväskylä, Jyväskylä FI-40014 Finland*

*d. Department of Ocean Science and Engineering, Southern University of Science and Technology, Shenzhen 518055, China*

Table 1. Ingredient list of BG11 culture media

|          |       | Chemicals                                                         | BG11<br>(mg·L <sup>-1</sup> ) |
|----------|-------|-------------------------------------------------------------------|-------------------------------|
|          | N     | Na <sub>2</sub> NO <sub>3</sub>                                   | 1500                          |
|          | K, P  | K <sub>2</sub> HPO <sub>4</sub>                                   | 40                            |
|          | Mg, S | MgSO <sub>4</sub> ·7H <sub>2</sub> O                              | 75                            |
| Major    | Ca    | CaCl <sub>2</sub> ·2H <sub>2</sub> O                              | 36                            |
| elements | C     | Citric acid                                                       | 6                             |
|          | Fe, C | FeC <sub>6</sub> H <sub>5</sub> O <sub>7</sub> ·5H <sub>2</sub> O | 6                             |
|          | C     | Na <sub>2</sub> EDTA                                              | 1                             |
|          | C     | Na <sub>2</sub> CO <sub>3</sub>                                   | 20                            |
|          | B     | H <sub>3</sub> BO <sub>3</sub>                                    | 2.68                          |
|          | Mn    | MnCl <sub>2</sub> ·4H <sub>2</sub> O                              | 1.86                          |
| Minor    | Zn    | ZnSO <sub>4</sub> ·7H <sub>2</sub> O                              | 0.22                          |
| elements | Mo    | Na <sub>2</sub> MoO <sub>4</sub> ·2H <sub>2</sub> O               | 0.39                          |
|          | Cu    | CuSO <sub>4</sub> ·5H <sub>2</sub> O                              | 0.08                          |
|          | Co    | Co(NO <sub>3</sub> ) <sub>2</sub> ·6H <sub>2</sub> O              | 0.05                          |
